# Supplementary material for: Sexually transmitted infection testing and self-reported diagnoses among a community sample of men who have sex with men, in Scotland
Source: HighWire-hosted journal article supplement (doi:10.1136/sextrans-2012-050605), 2012-10-05
Supplement: sextrans-2012-050605supp_appendix.pdf [file sextrans-2012-050605supp_appendix.pdf]

## **Appendix 1: Sexual Health Knowledge and Psychosocial Norm Scales included in the 2010 MYPC Questionnaire**

### **SEXUAL HEALTH KNOWLEDGE**

Items were scored from 1 (“I knew this”) to 5 (“I don’t agree with this”).

#### **Sexual Health Knowledge**

| Item                                                                                                                                           |
|------------------------------------------------------------------------------------------------------------------------------------------------|
|                                                                                                                                                |
| 1. You should have a regular sexual health check up including an HIV test every 6 months to protect yourself from HIV and other STIs.          |
| 2. Sexual health check ups and HIV testing every 6 months help you look after your long term health.                                           |
| 3. You should have a sexual health check up including an HIV test as soon as possible if you have put yourself at risk or had unprotected sex. |
| 4. If you test positive for HIV there are effective treatments available which make HIV manageable as part of your every day life.             |

#### **Condom Knowledge**

| Item                                                                                                                                                     |
|----------------------------------------------------------------------------------------------------------------------------------------------------------|
|                                                                                                                                                          |
| 1. It is important to get the correct fitting condom to protect against HIV and other sexually transmitted infections.                                   |
| 2. The amount of lube you use is more important than the thickness of the condom.                                                                        |
| 3. You should not put lube on before the condom as this will increase the chance of the condom slipping off.                                             |
| 4. Reapplying the lube often will help prevent your condom from breaking.                                                                                |
| 5. If you're having a long session, you should change the condom every 30 minutes or so.                                                                 |
| 6. You should not use oil based lubes (baby oil, Vaseline, olive oil, most moisturisers) as these can damage the condom causing it to split.             |
| 7. If you are using a sex toy, you should place a condom on the toy, and you should change the condom for every new partner (and for every new session). |
| 8. If you are being insertive (active) with more than one partner, you should change the condom between partners.                                        |

## PSYCHOSOCIAL NORMS

Items were scored from 1 (“Strongly Agree”) to 5 (“Strongly Disagree”).

### Barebacking Norms

|                                                                  |
|------------------------------------------------------------------|
| 1. Barebacking is now part of the gay culture                    |
| 2. I think of myself as a barebacker                             |
| 3. Barebacking porn tempts me to have anal sex without a condom. |
| 4. I know people who would describe themselves as barebackers.   |

### Attitudes and Norms about Contemporary Condom Use (the ANCCU Scale)

|                                                                                     |
|-------------------------------------------------------------------------------------|
| Item                                                                                |
|                                                                                     |
|                                                                                     |
| 1. A lot of gay men have stopped using condoms all the time                         |
| 2. I only need to use condoms with casual partners                                  |
| 3. I don't have to use condoms all the time anymore                                 |
| 4. I only need to use condoms with partners who have a different HIV status from me |
| 5. I know the HIV status of most of my sexual partners                              |
| 6. I can't be bothered with using condoms                                           |
| 7. The more you love someone the more difficult it is to use condoms                |
| 8. If someone wants to have unprotected sex they are probably HIV negative          |
| 9. I enjoy the thrill of not using condoms with guys whose status I don't know      |
| 10. Using condoms is a choice now, not a necessity                                  |

### Safer Sex Norms

|                                                                                 |
|---------------------------------------------------------------------------------|
| Item                                                                            |
|                                                                                 |
|                                                                                 |
| 1. I'm letting other people down when I have unsafe sex.                        |
| 2. My sex partners never mention safer sex.                                     |
| 3. Most people I know always have safer sex.                                    |
| 4. Most of my friends think you should talk about safer sex with your partners. |
| 5. Nobody has safer sex all the time.                                           |
| 6. My friends never tell me to have safer sex.                                  |
| 7. I'm letting myself down when I have unsafe sex.                              |
| 8. You should tell your friends to always have safer sex.                       |
